# Supplementary figures and images for: Witnessing Evolution of SARS-CoV-2 through Comparative Phylogenomics: The Proximate Origin is Guangdong, not Wuhan
Source: Preprints.org preprint supplement (doi:10.20944/preprints202005.0332.v2), 2020-06-21

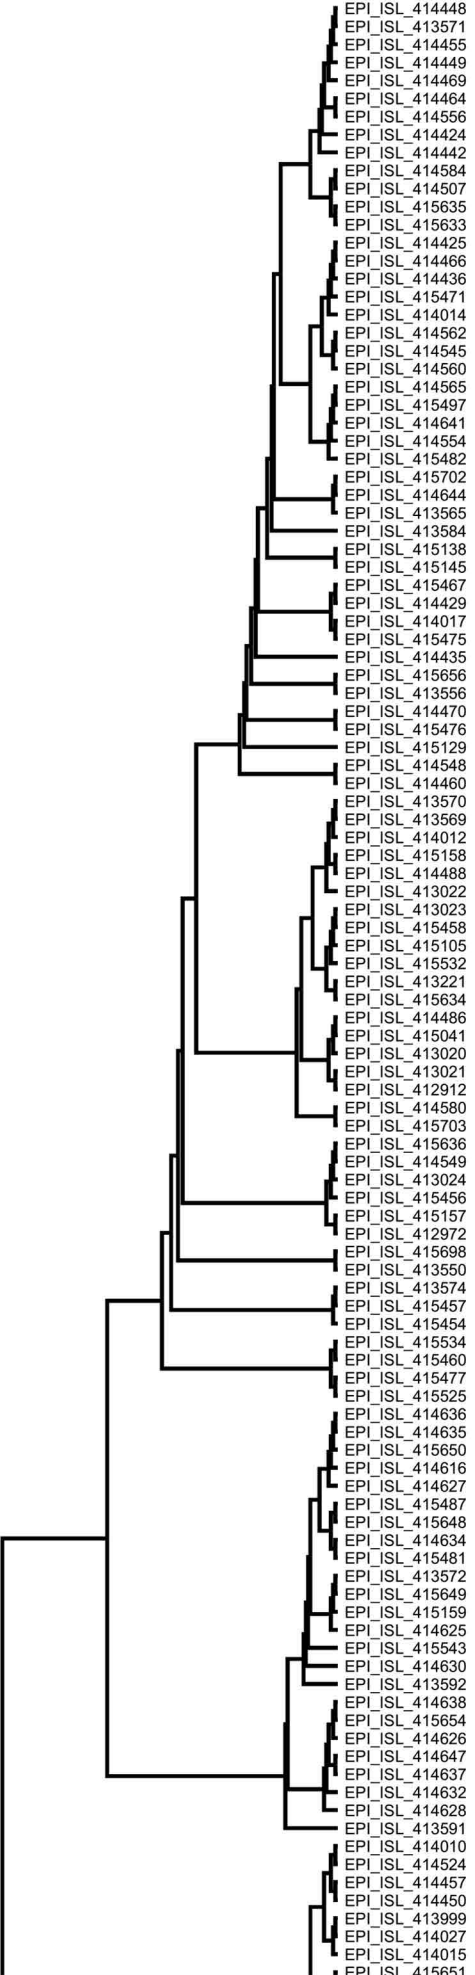

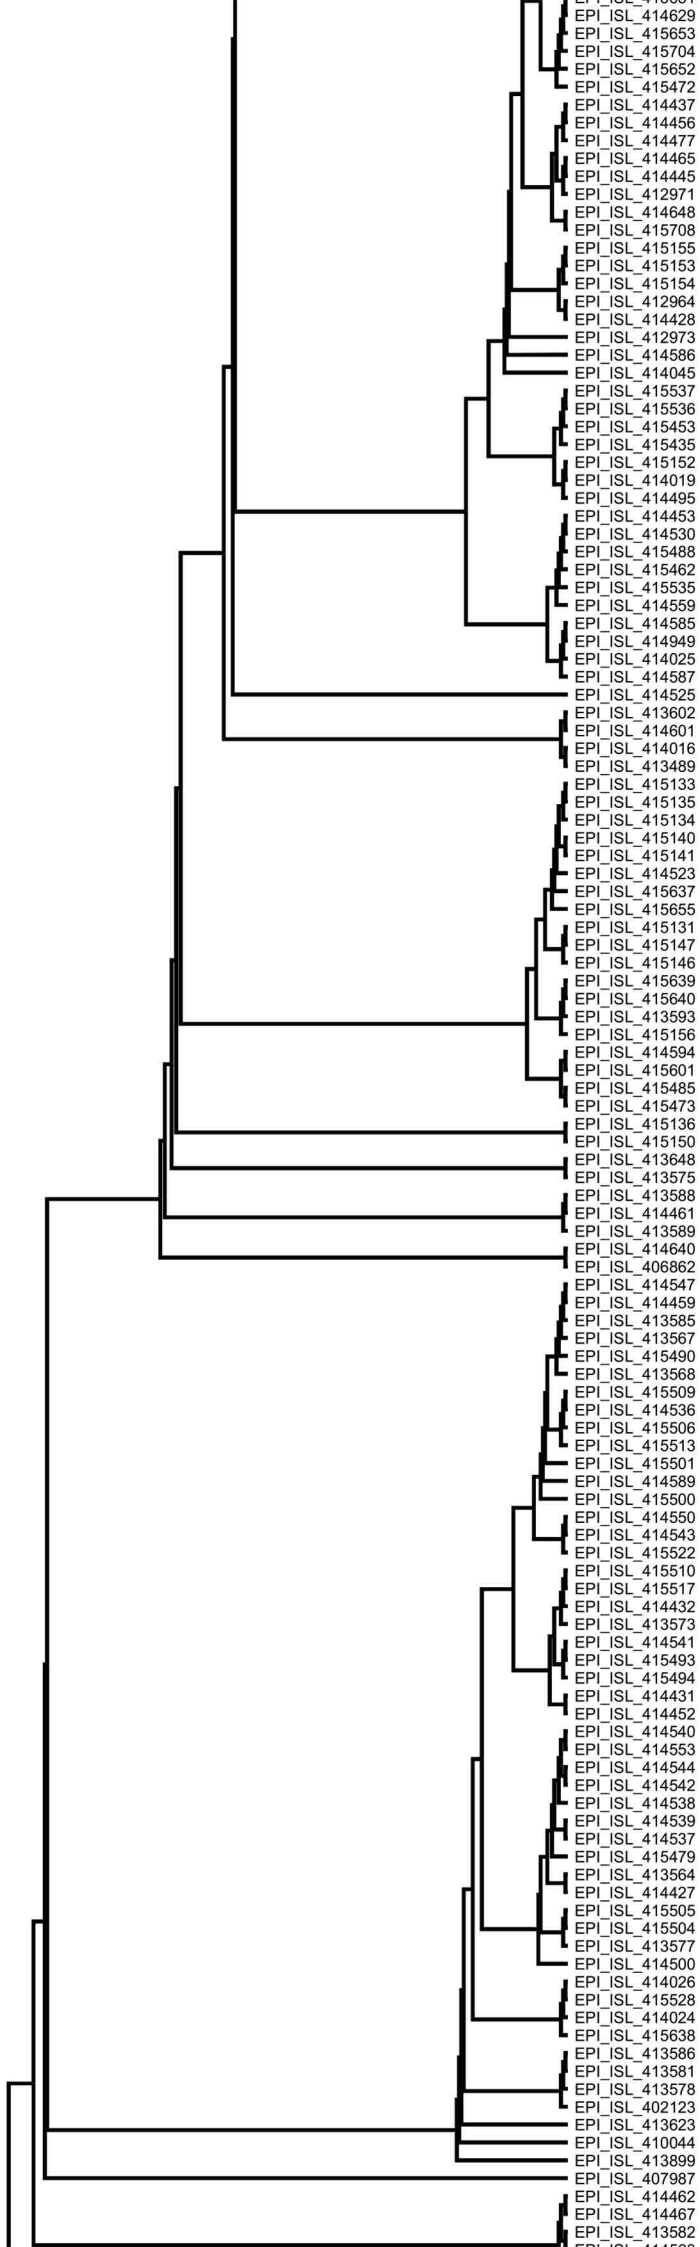

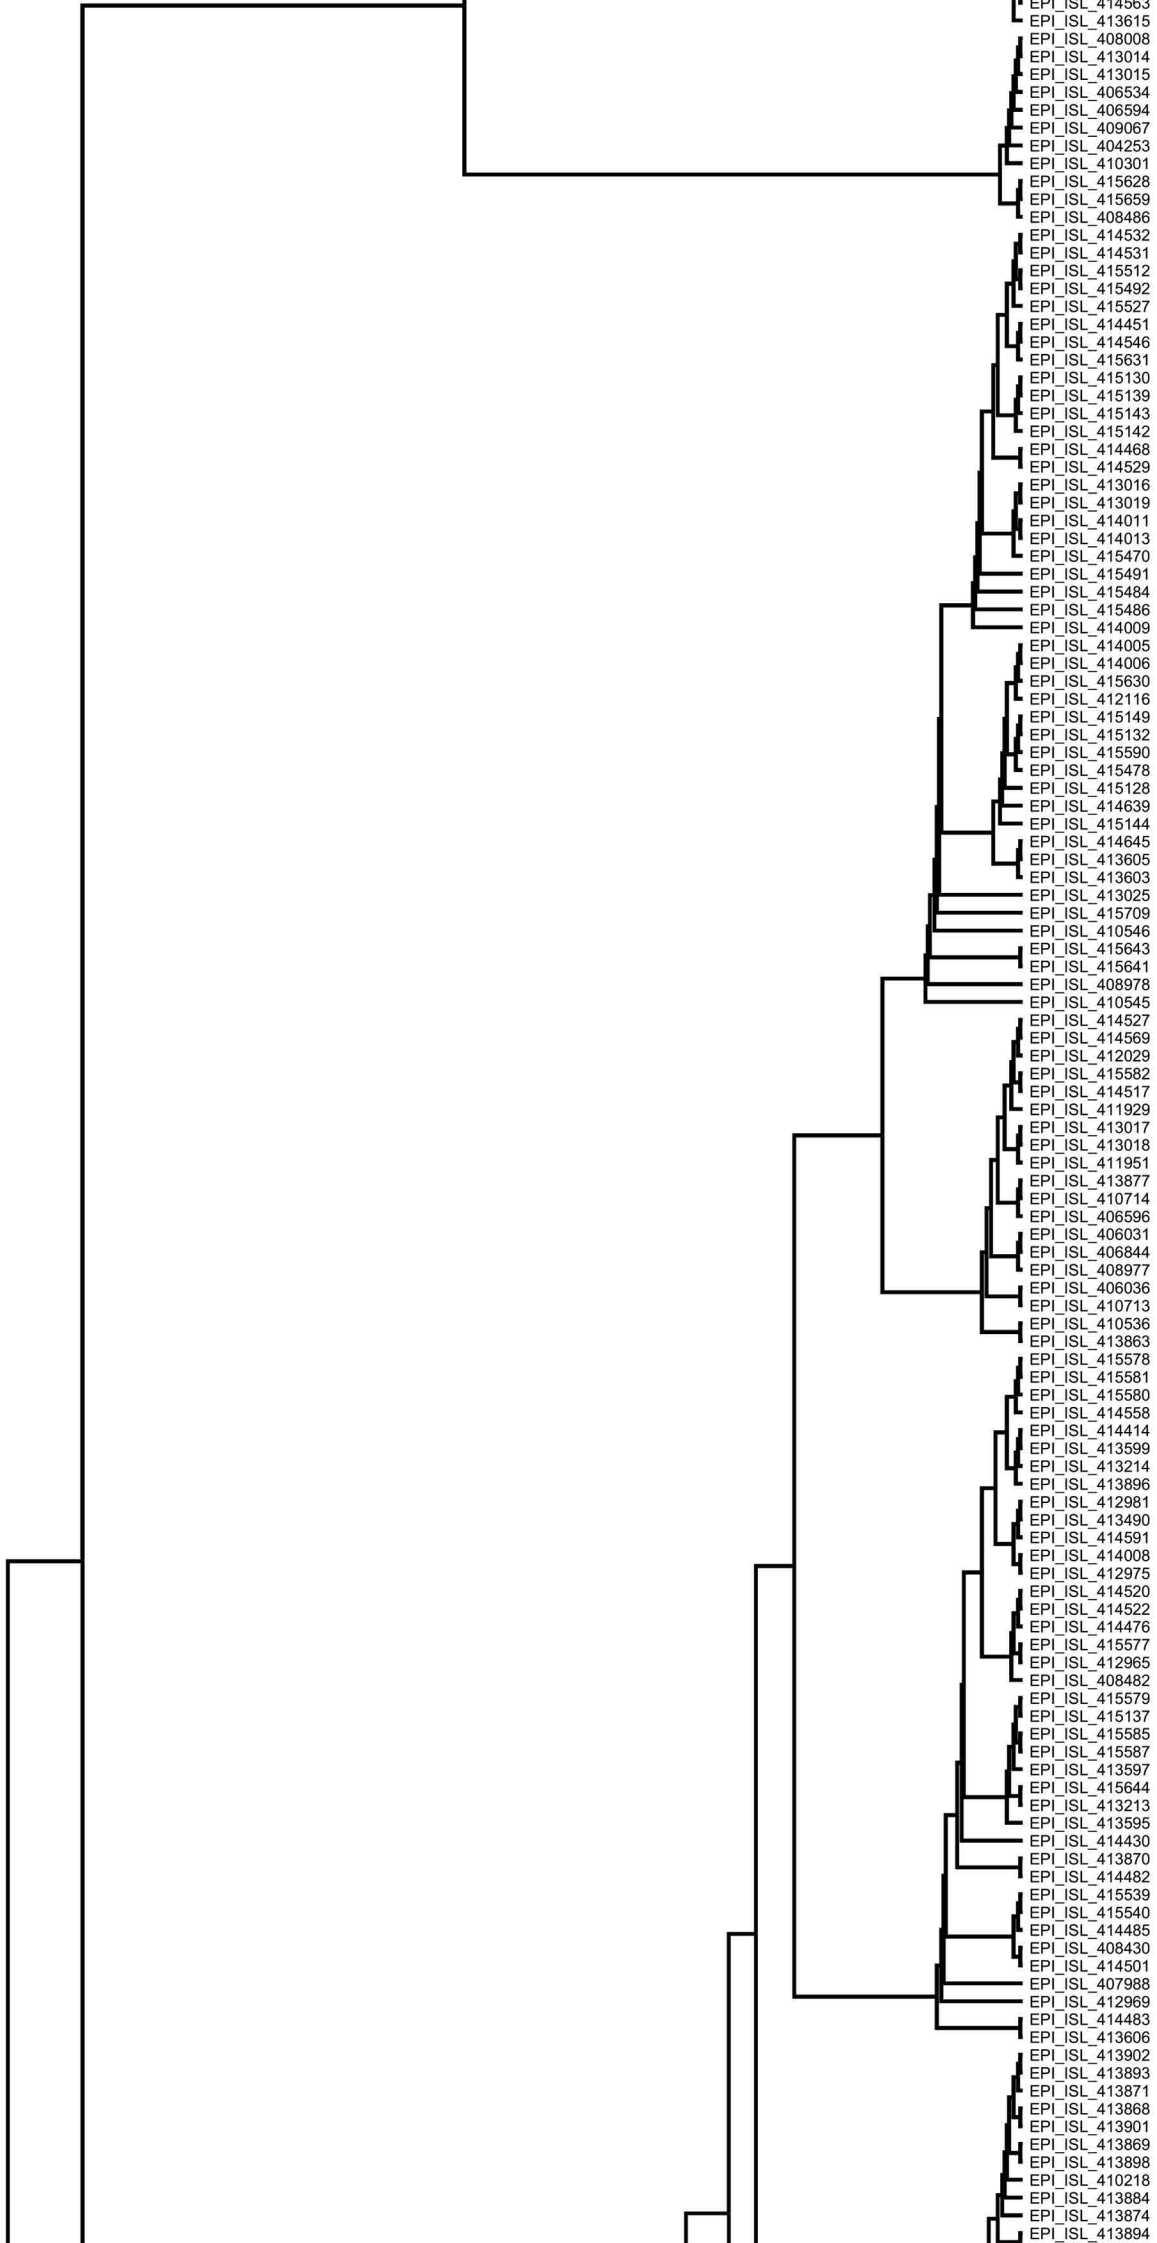

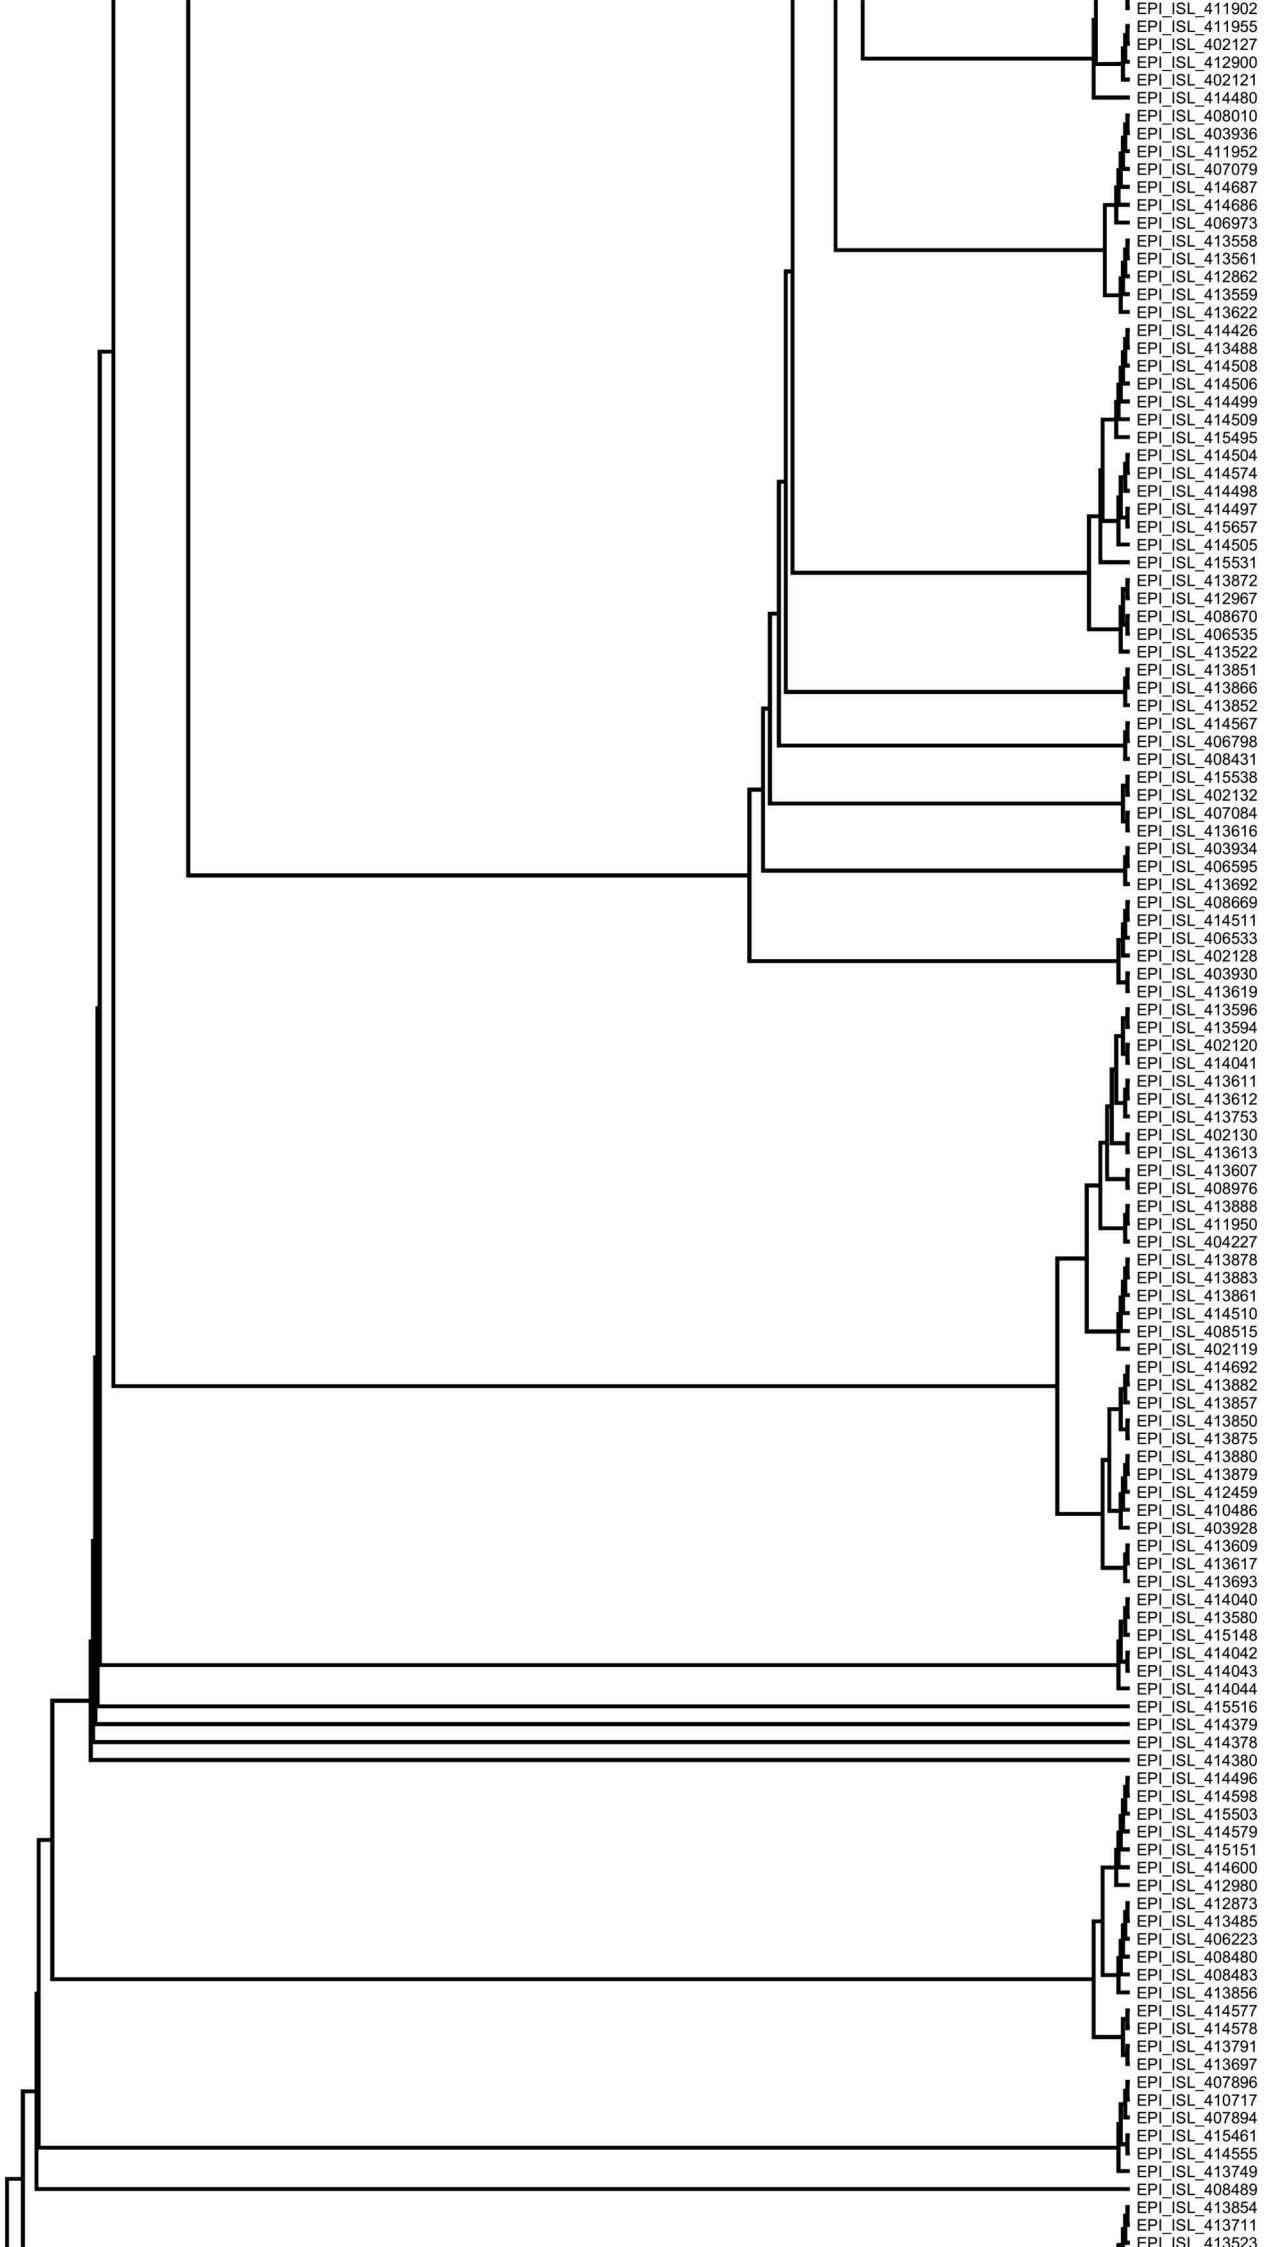



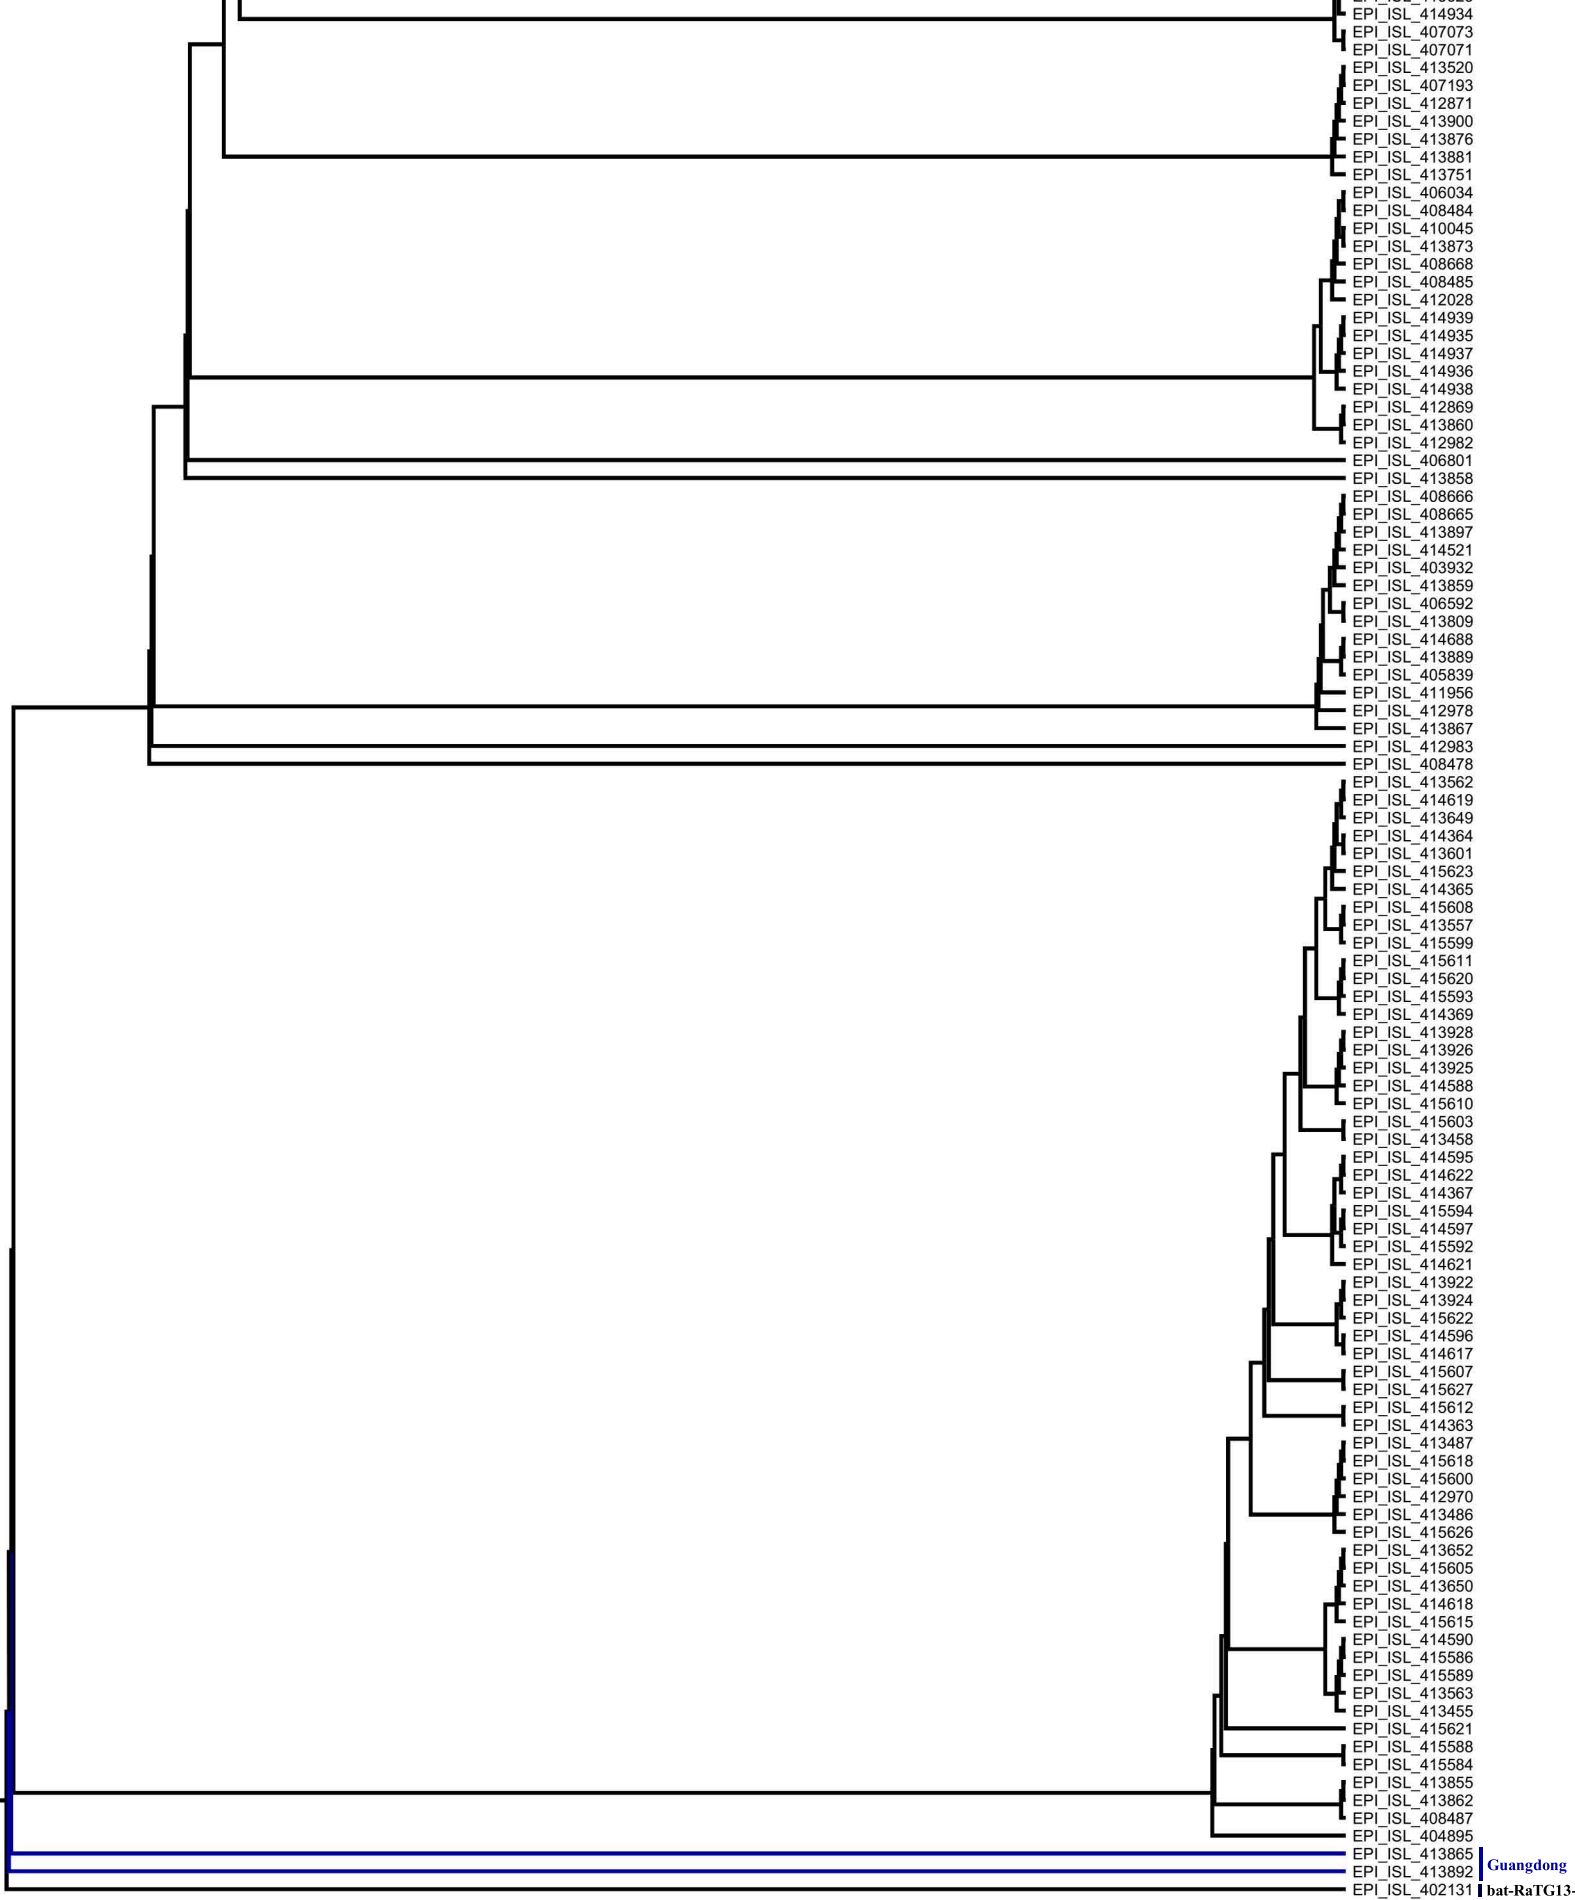

Supplement: Supplementary file 1 [file supplementary:Figure%20S2.pdf]
